# Supplementary material for: Three dimensional M × N type aptamer-functionalized solid-phase micro extraction fibers array for selectively sorptive extraction of multiple antibiotic residues in milk
Source: Royal Society of Chemistry journal article supplement (doi:10.1039/c6ra27005k), 2017-01-01
Supplement: c6ra27005k1.pdf [file c6ra27005k1.pdf]

**Three dimensional M×N type aptamer-functionalized solid-phase micro extraction fibers  
array for selectively sorptive extraction of multiple antibiotic residues in milk**

Haibo Liu <sup>a</sup>, Ning Gan<sup>a, \*</sup>, Yinji Chen<sup>b</sup>, Tianhua Li<sup>a</sup>, Yuting Cao <sup>a</sup>

a. Faculty of Materials Science and Chemical Engineering, Ningbo University, Ningbo, 315211,  
China

b. Department of Food Science and Engineering/Collaborative Innovation Center for Modern  
Grain Circulation and Safety, Nanjing University of Finance and Economics, Nanjing, 210046,  
China

\*. Corresponding author. Tel.: +86 574 87608347; fax: +86 574 87608347.

E-mail addresses: ganning@nbu.edu.cn

**Table S1** The effects on the recovery of targets using different ratios of three chloramphenicols.

| <b>Ratios</b> |            |           | <b>Recovery (%)</b> |            |           |
|---------------|------------|-----------|---------------------|------------|-----------|
| <b>CAP</b>    | <b>TAP</b> | <b>FF</b> | <b>CAP</b>          | <b>TAP</b> | <b>FF</b> |
| 1             | 5          | 10        | 89.1                | 89.2       | 93.1      |
| 5             | 1          | 10        | 90.5                | 92.2       | 92.6      |
| 10            | 5          | 1         | 89.5                | 94.4       | 94.6      |
| 1             | 10         | 5         | 89.2                | 92.9       | 89.6      |
| 5             | 10         | 1         | 91.1                | 89.2       | 94.8      |
| 10            | 1          | 5         | 90.8                | 88.2       | 91.4      |

**Table S2** The extraction efficiency of the method for three chloramphenicols.

| <b>Targets</b> | <b>Extraction time</b> | <b>Desorption time</b> | <b>Adsorption capacity (ng/fiber)</b> | <b>Recovery</b> |
|----------------|------------------------|------------------------|---------------------------------------|-----------------|
| <b>CAP</b>     |                        |                        | 887                                   | 80.2-91.5 %     |
| <b>TAP</b>     | 20 min*                | 10 min*                | 840                                   | 76.5-92.4 %     |
| <b>FF</b>      |                        |                        | 801                                   | 75.7-94.5 %     |

\* Total for 12 samples

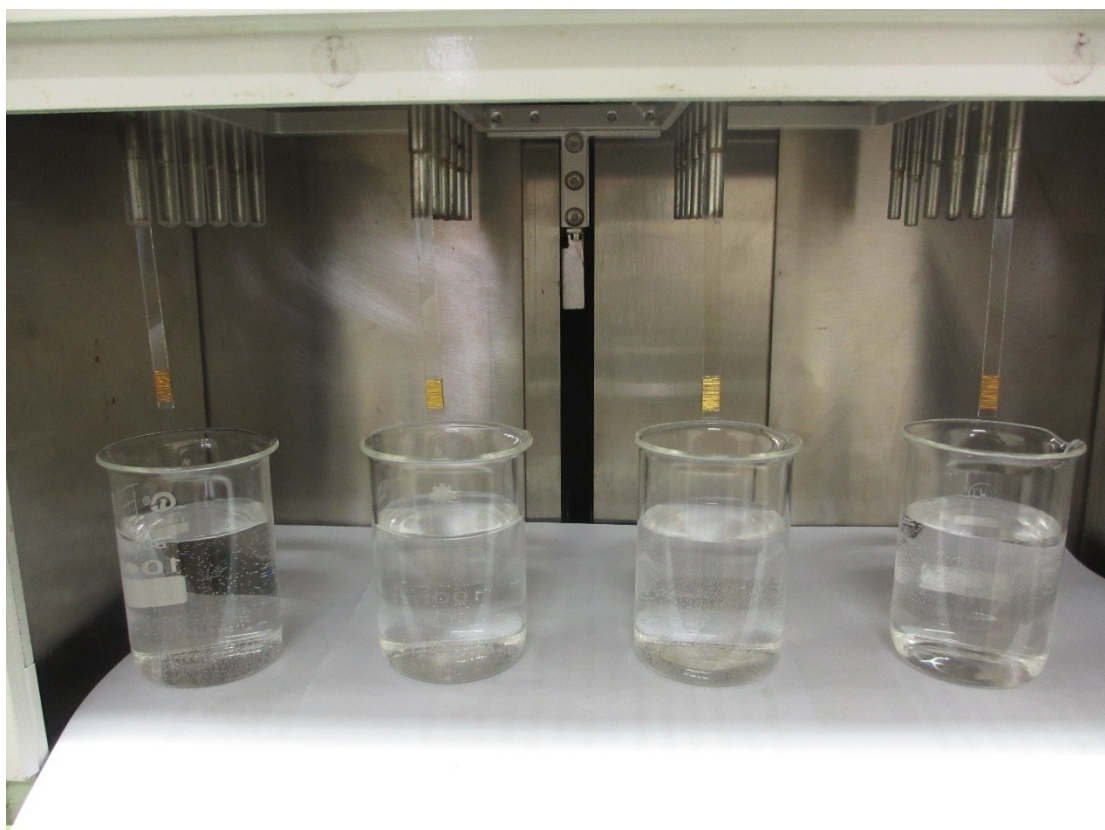

Fig. S1 The fiber sorption extraction assay

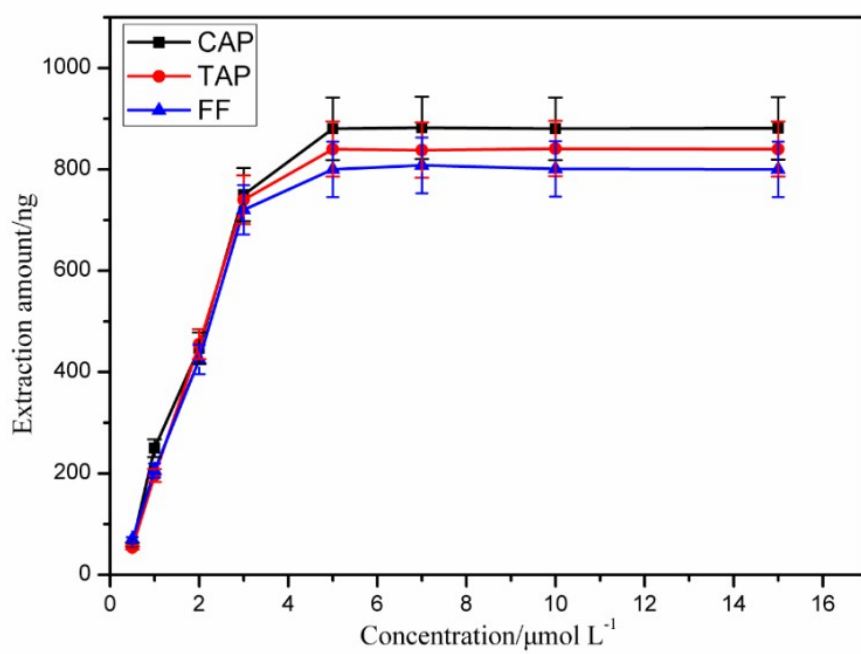

Fig. S2 Optimization of aptamer amount

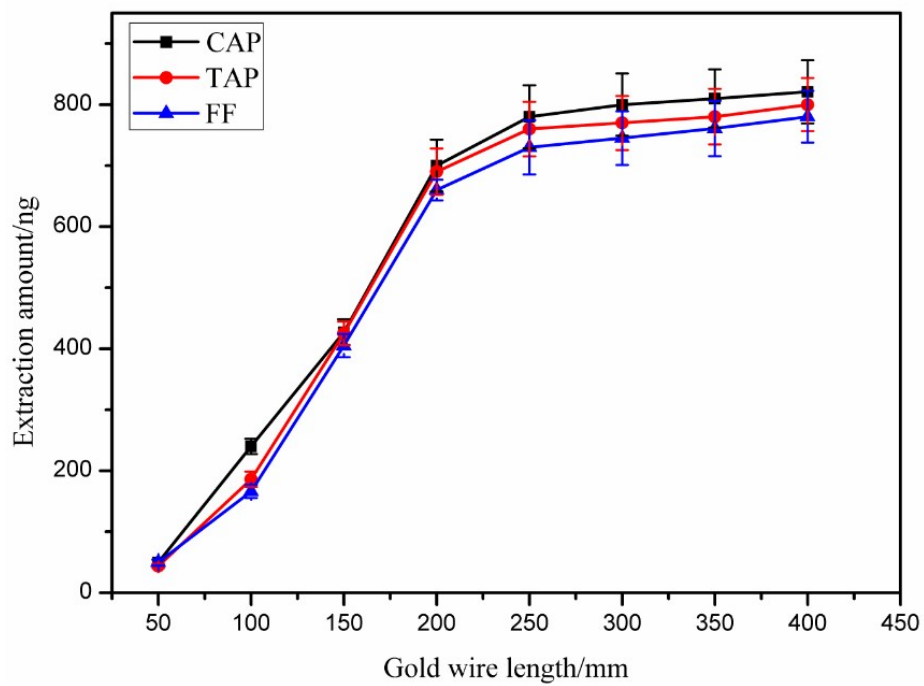

Fig. S3 Optimization of gold wire length

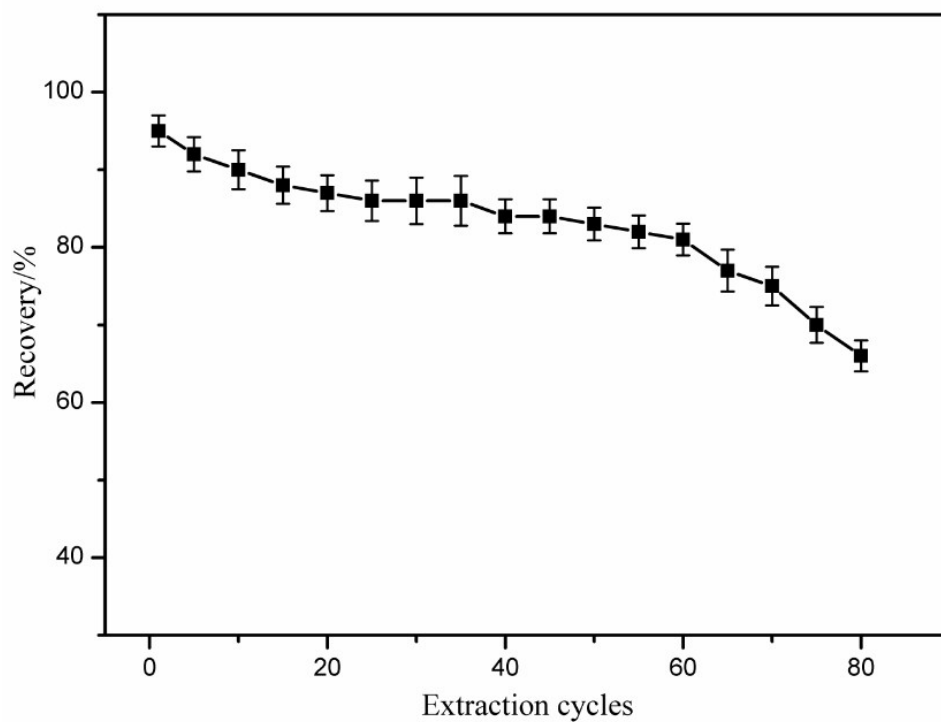

Fig. S4 Reusability of the coating

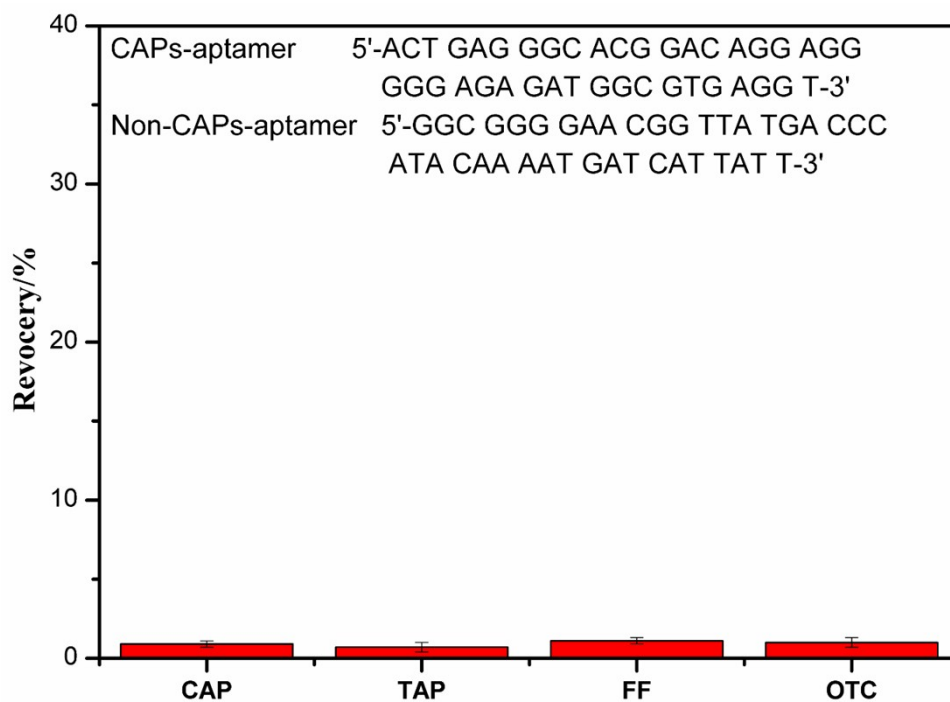

Fig. S5 The adsorption of chaotic sequence for CAP, TAP, FF and OTC

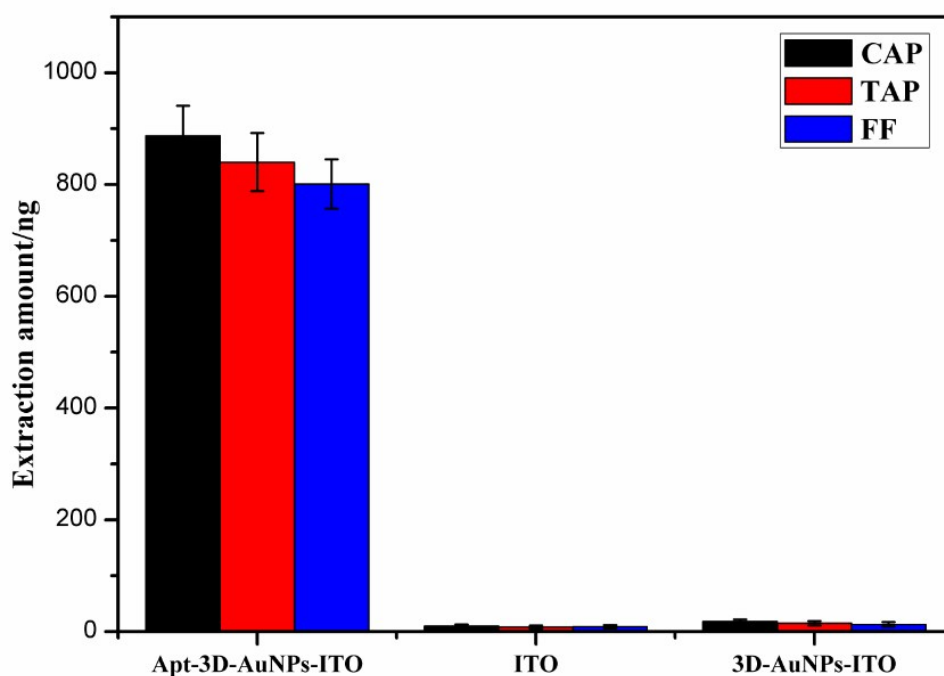

Fig. S6 Compare the absorption ability of Apt-3D-AuNPs-ITO fiber, ITO fiber and 3D-AuNPs-

ITO fiber

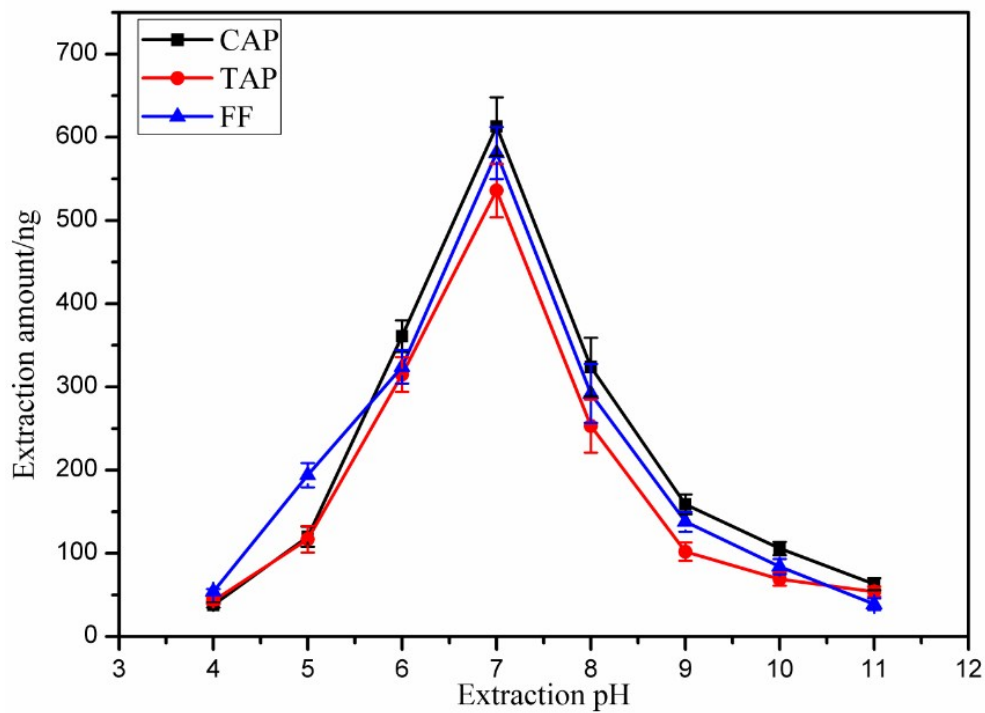

Fig. S7 Optimization of extraction pH

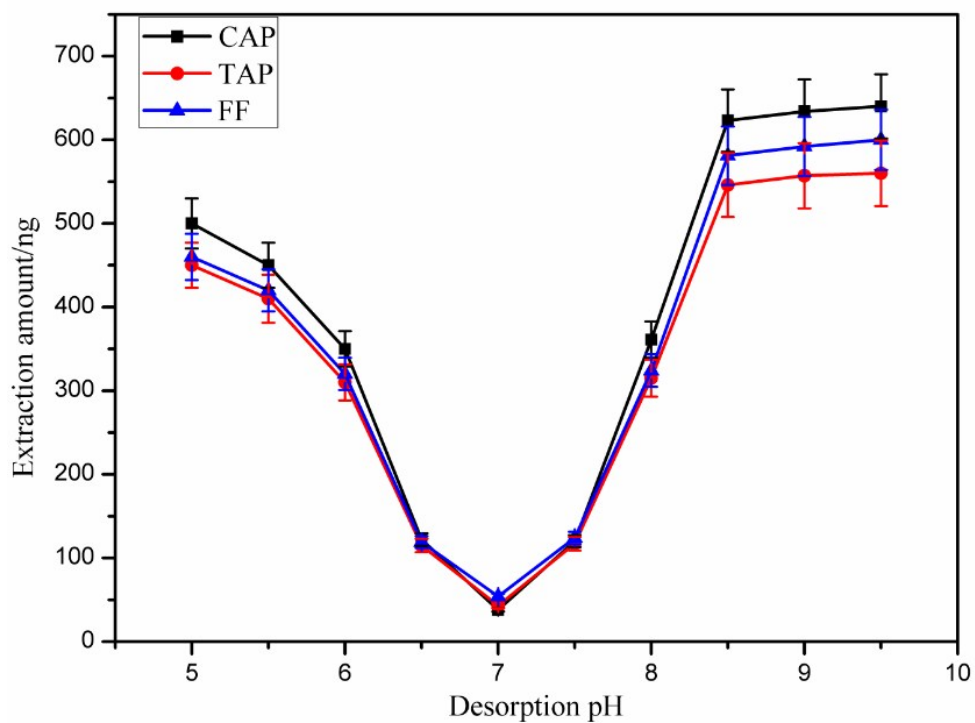

Fig. S8 Optimization of desorption pH

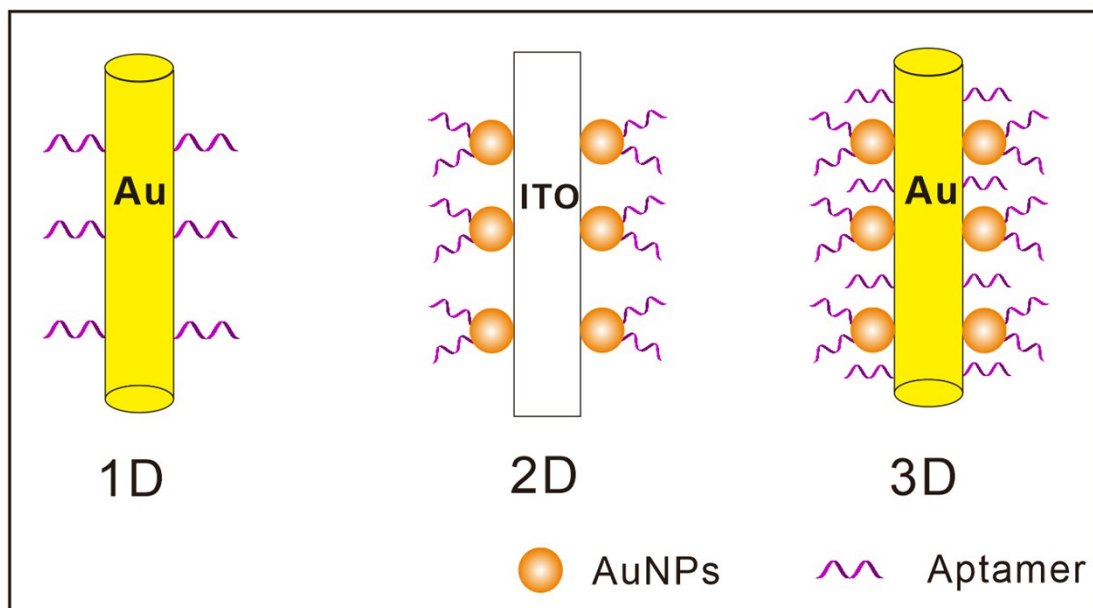

**Fig. S9** The sketch of 1D-Apt@Au Wire-ITO, 2D-Apt@AuNPs-ITO and 3D-Apt@AuNPs@Au Wire-ITO.

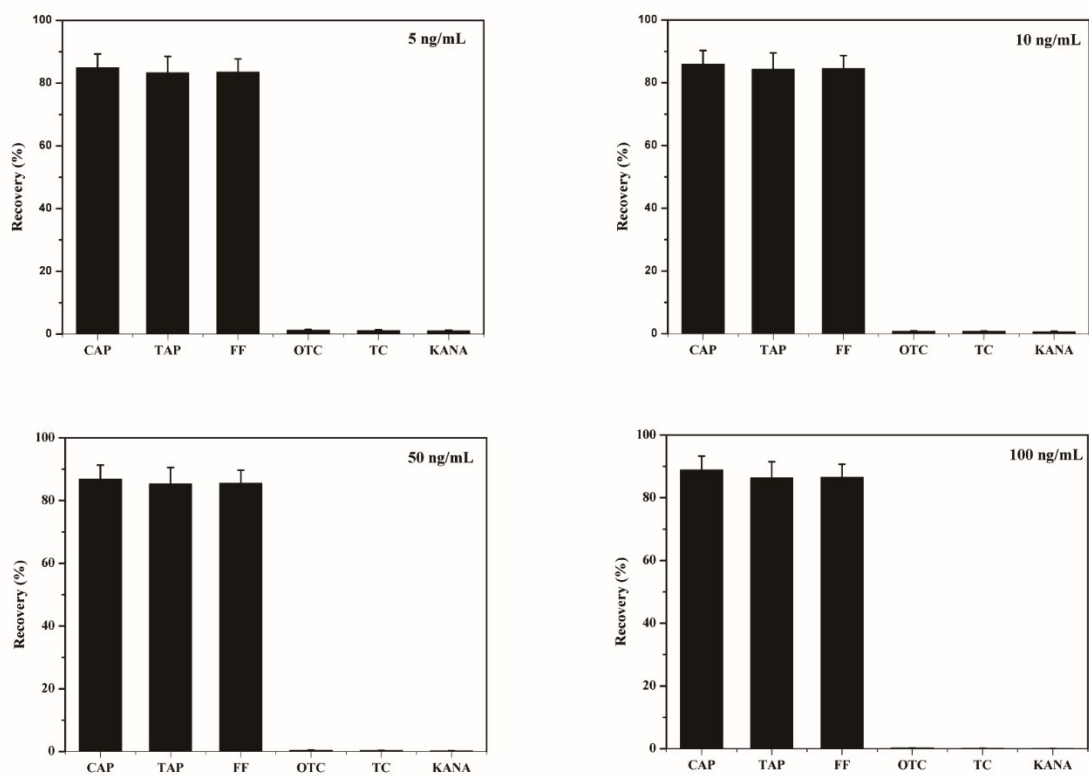

**Fig. S10** The different concentrations of interfering chemicals

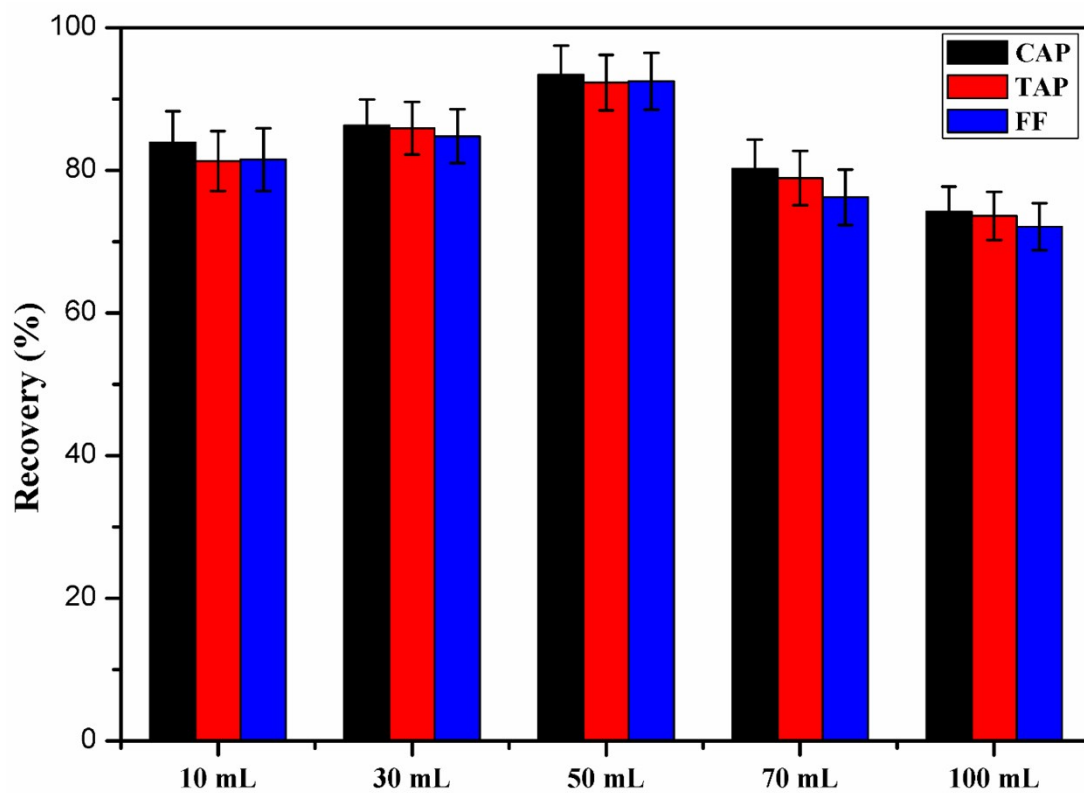

Fig. S11. Optimization of sample volume.
